# Supplementary material for: Composite barrier membrane for bone regeneration: advancing biomaterial strategies in defect repair
Source: Royal Society of Chemistry journal article supplement (doi:10.1039/d4ra07623k), 2025-01-01
Supplement: d4ra07623k1.pdf [file d4ra07623k1.pdf]

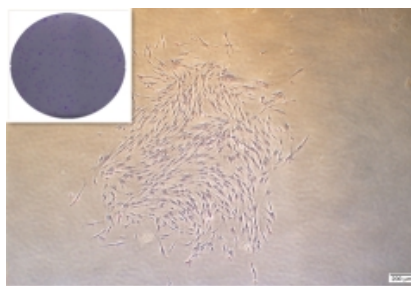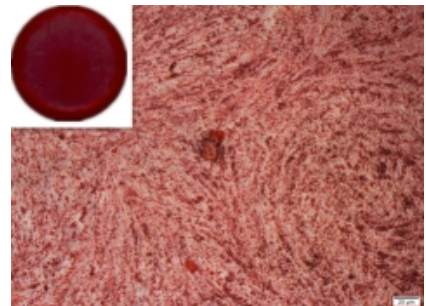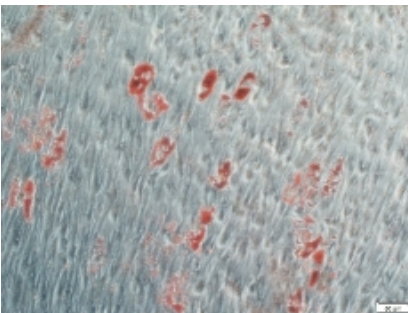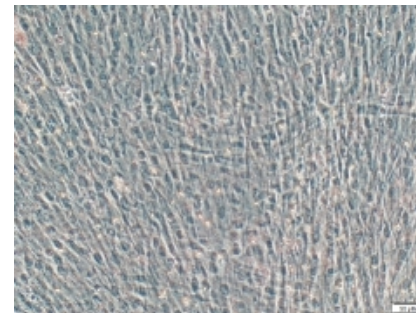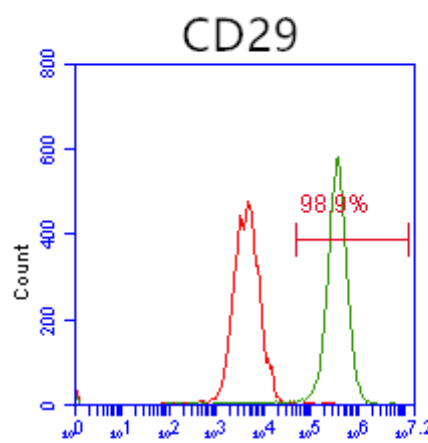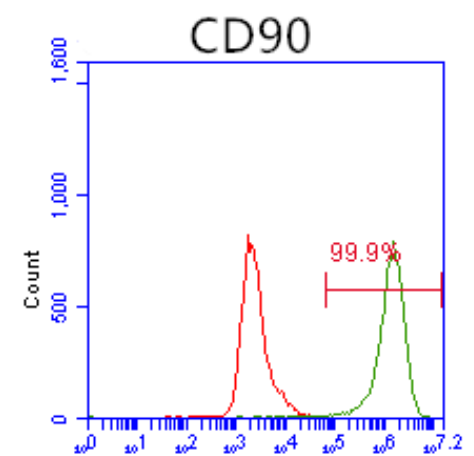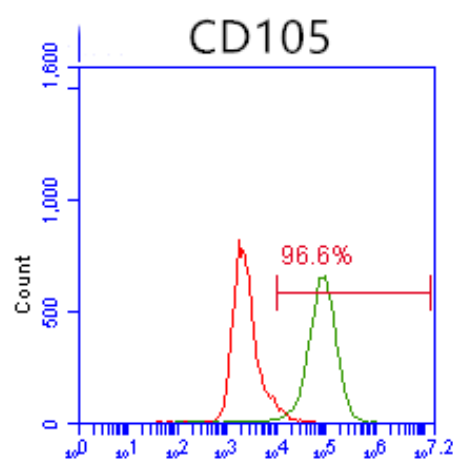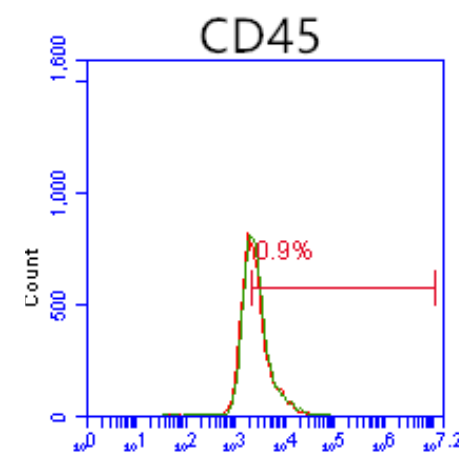

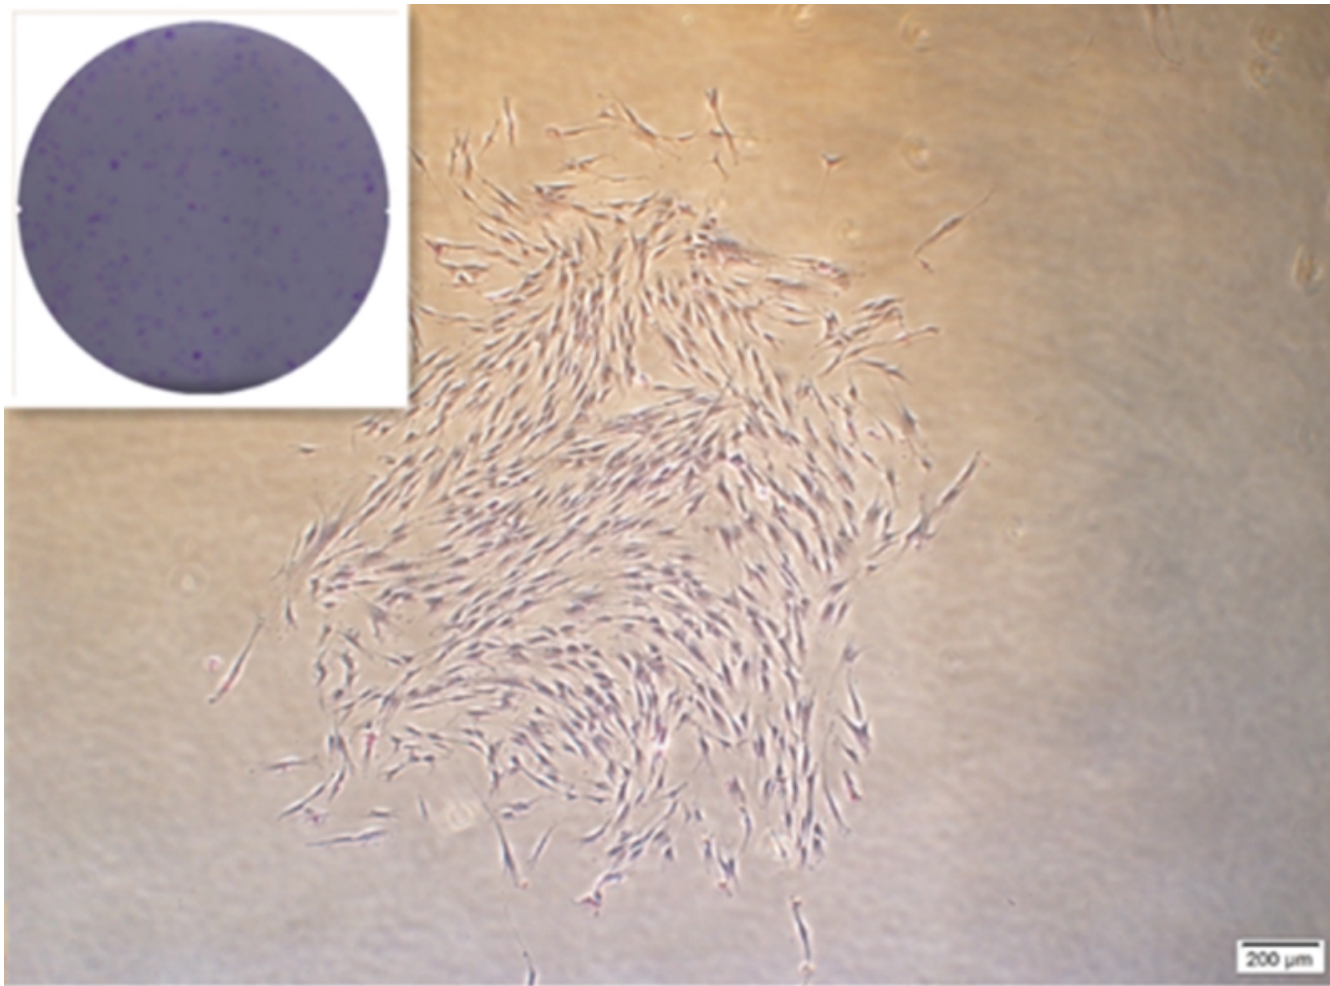

a. Single colonies of hPDLSCs after 10 d.

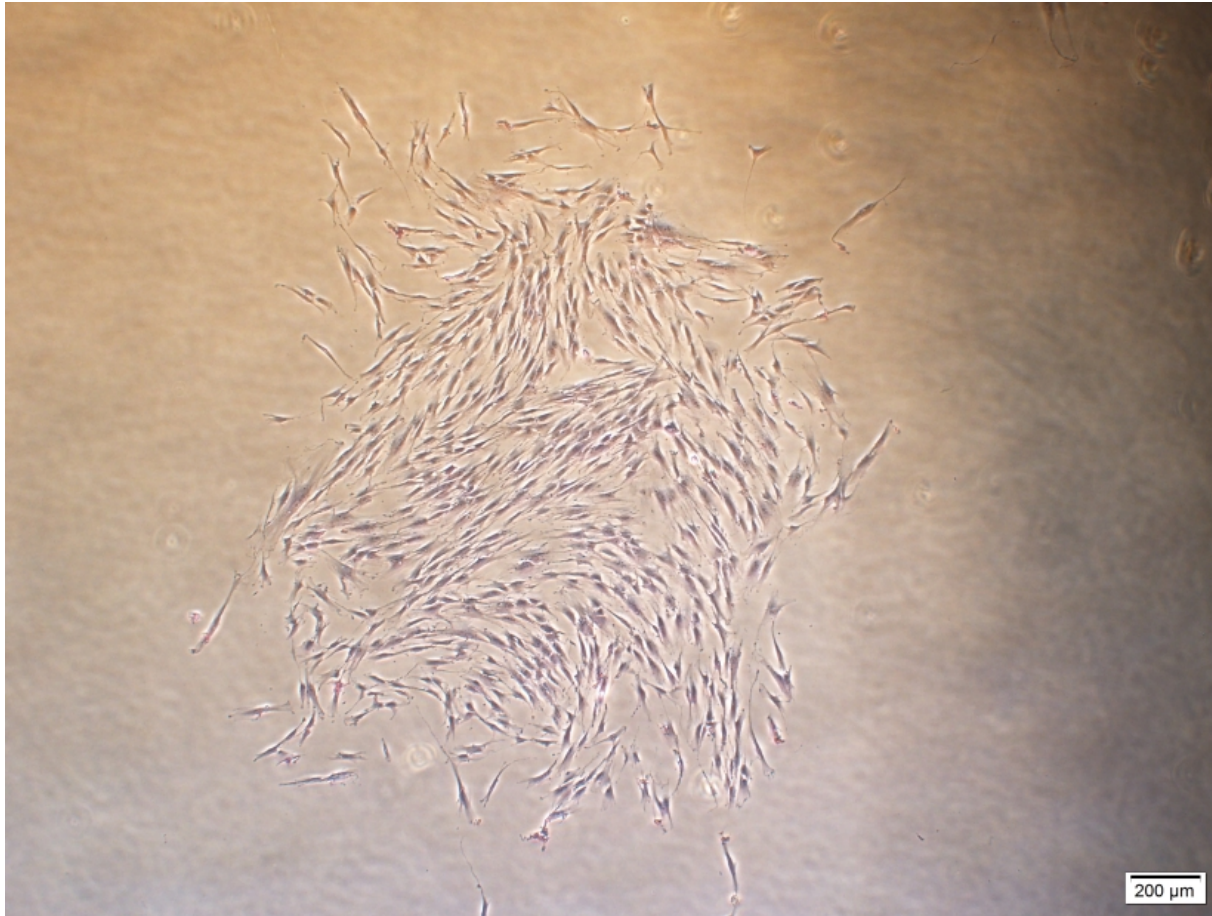

a. Single colonies of hPDLSCs after 10 d.

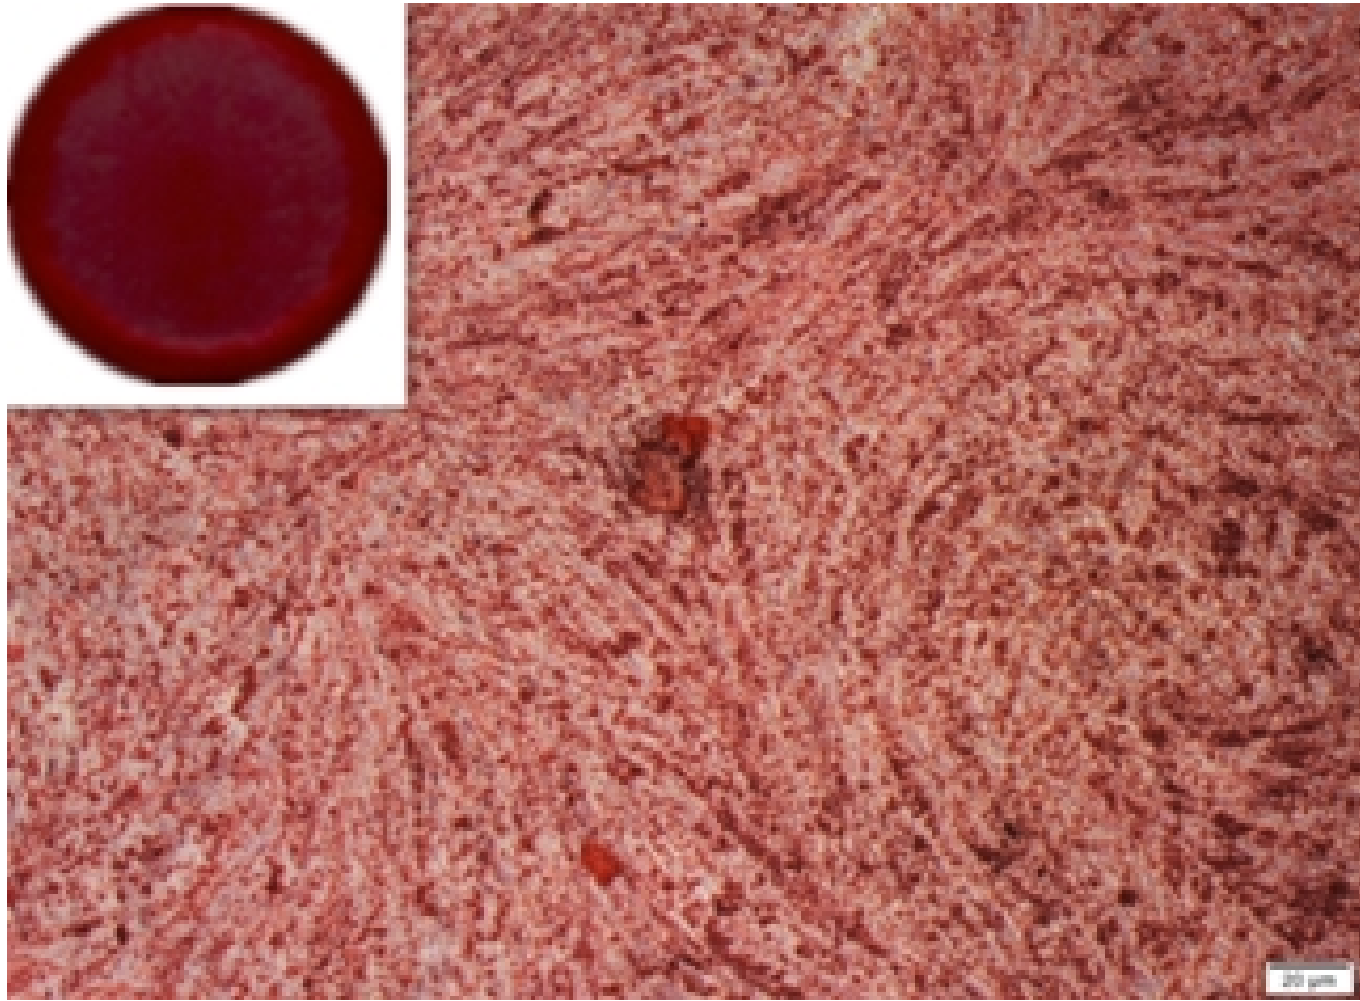

b. Bone formation experiment with alizarin red staining.



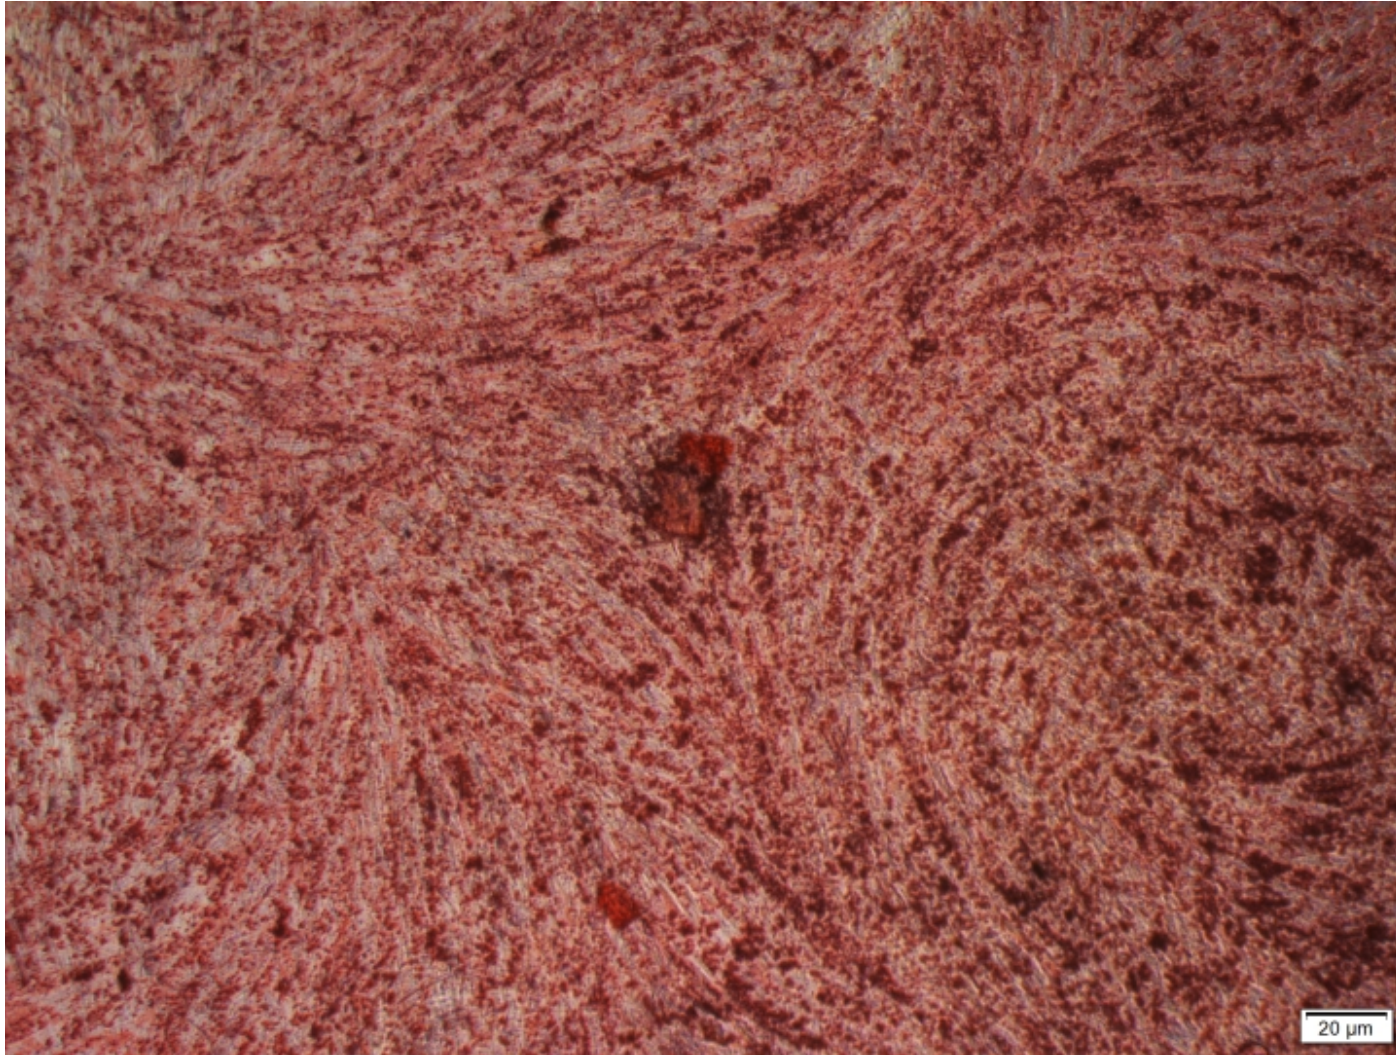

b. Bone formation experiment with alizarin red staining.

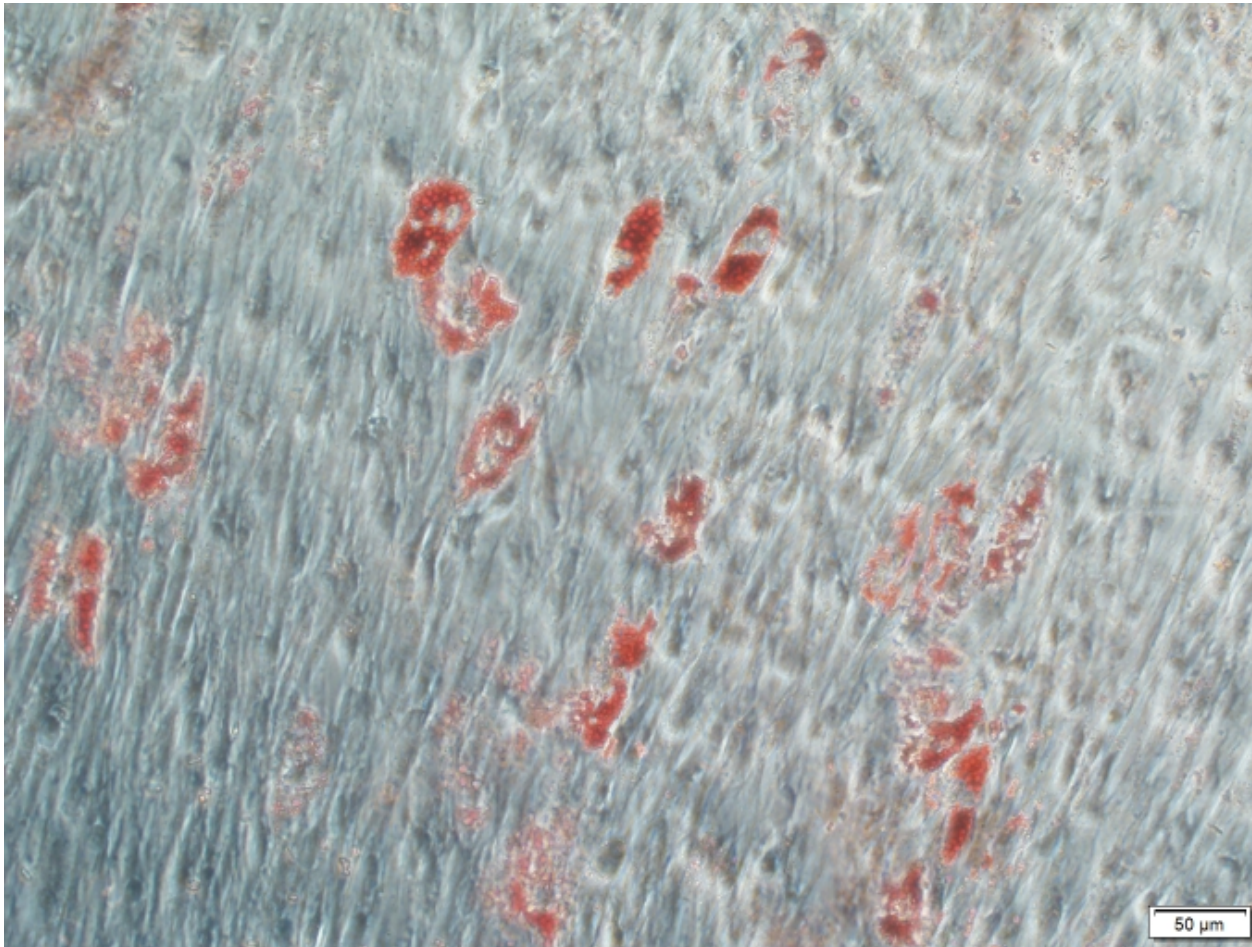

c. Positive fat formation experiment with oil red O staining



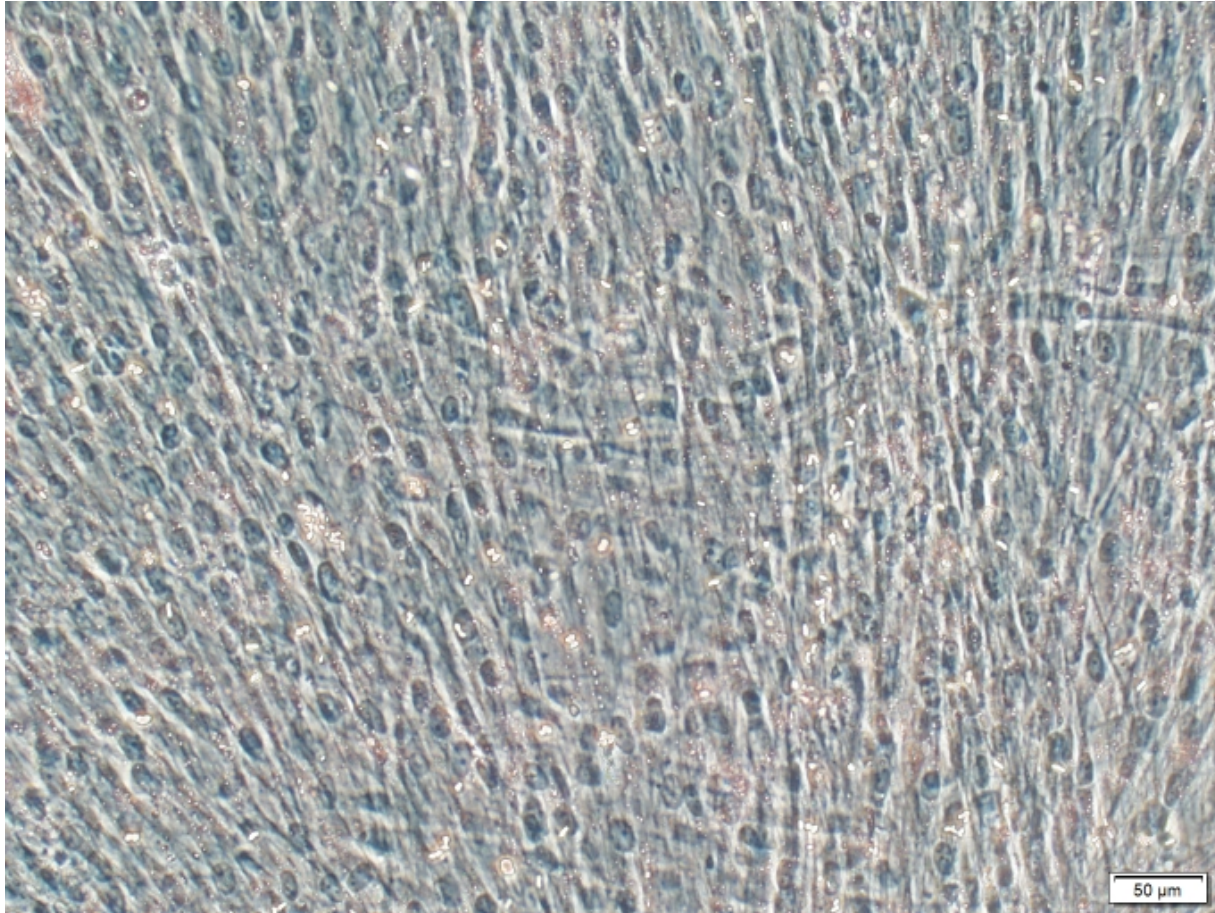

d. Negative fat formation experiment with oil red O staining

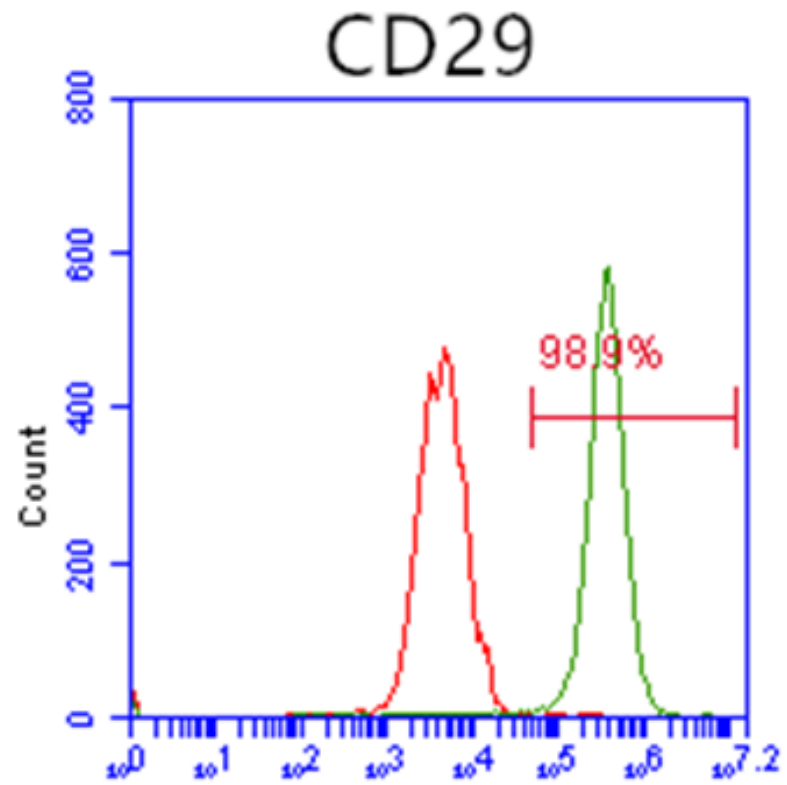

e. Positive for the mesenchymal stem cells (MSCs) markers CD29.



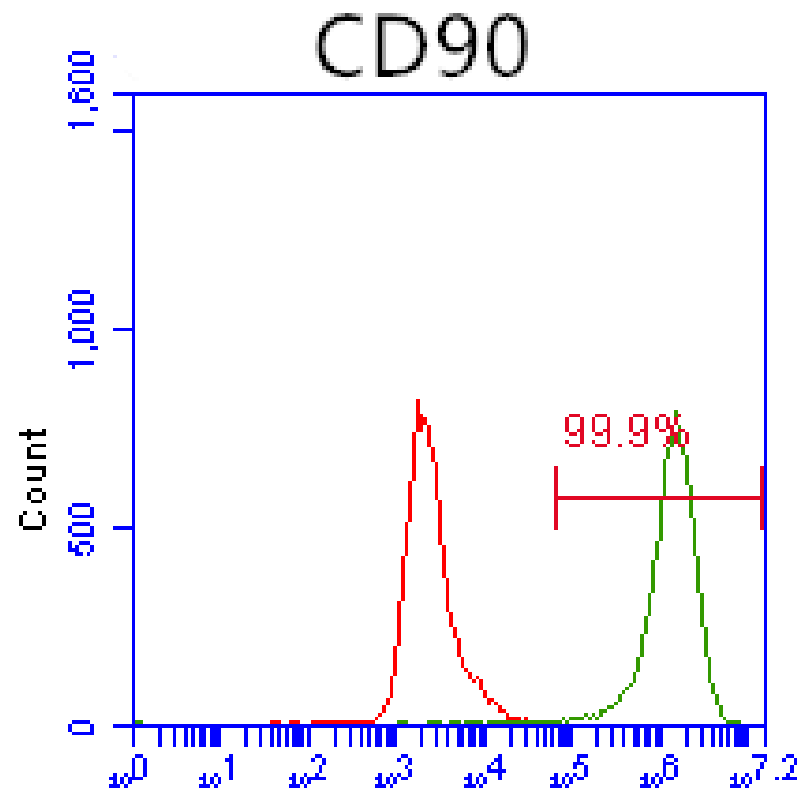

f. Positive for the mesenchymal stem cells (MSCs) markers CD90.

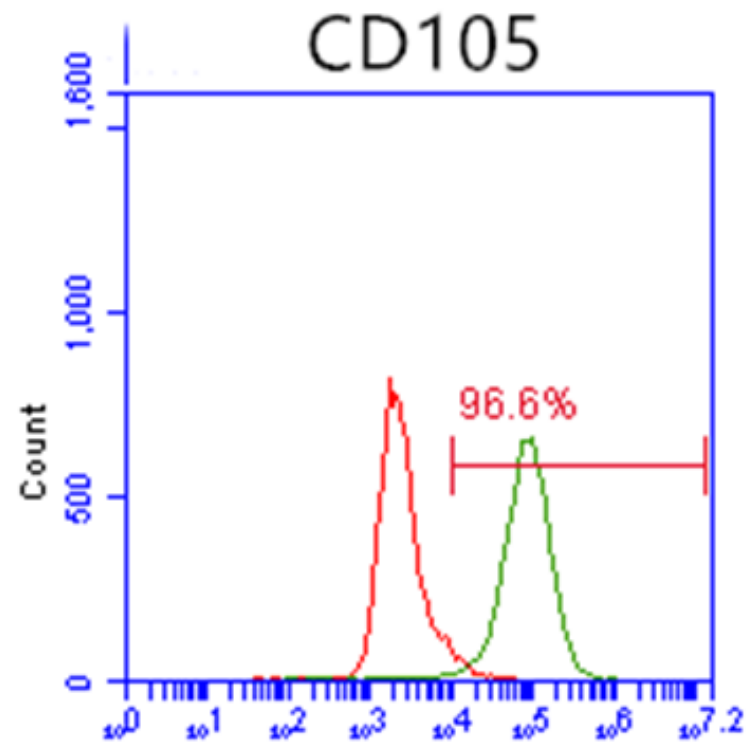

g. Positive for the mesenchymal stem cells (MSCs) markers CD105.

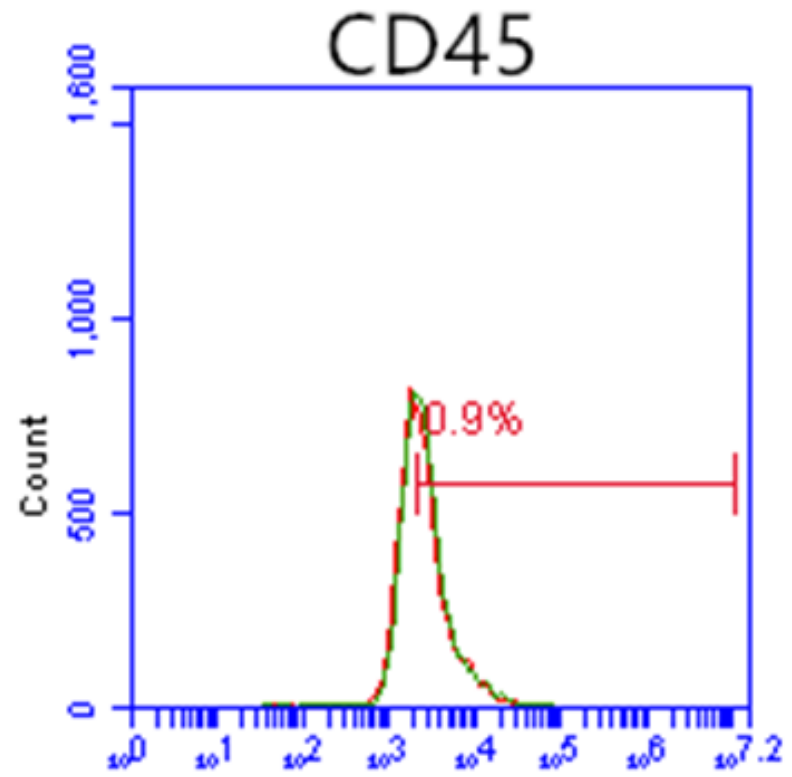

h. negative for the mesenchymal stem cells (MSCs) markers CD105.
